# Supplementary material for: An optimized genetically encoded dual reporter for simultaneous ratio imaging of Ca2+ and H+ reveals new insights into ion signaling in plants
Source: PubMed Central journal article supplement — New Phytol. Author manuscript; Available in PMC 2021 Aug 24. (PMC8383442; doi:10.1111/nph.17202), 2021-02-18
Supplement: NIHMS1733696-supplement-supplementary_files.pdf [file NIHMS1733696-supplement-supplementary_files.pdf]

# **New Phytologist Supporting Information**

**An optimized genetically encoded dual reporter for simultaneous ratio imaging of Ca<sup>2+</sup>- and H<sup>+</sup> reveals new insights into ion signaling in plants**

Kunkun Li, Juan Prada, Daniel S.C. Damineli, Anja Liese, Tina Romeis, Thomas Dandekar, José A. Feijó, Rainer Hedrich and Kai Robert Konrad

article acceptance date: 23 December 2020

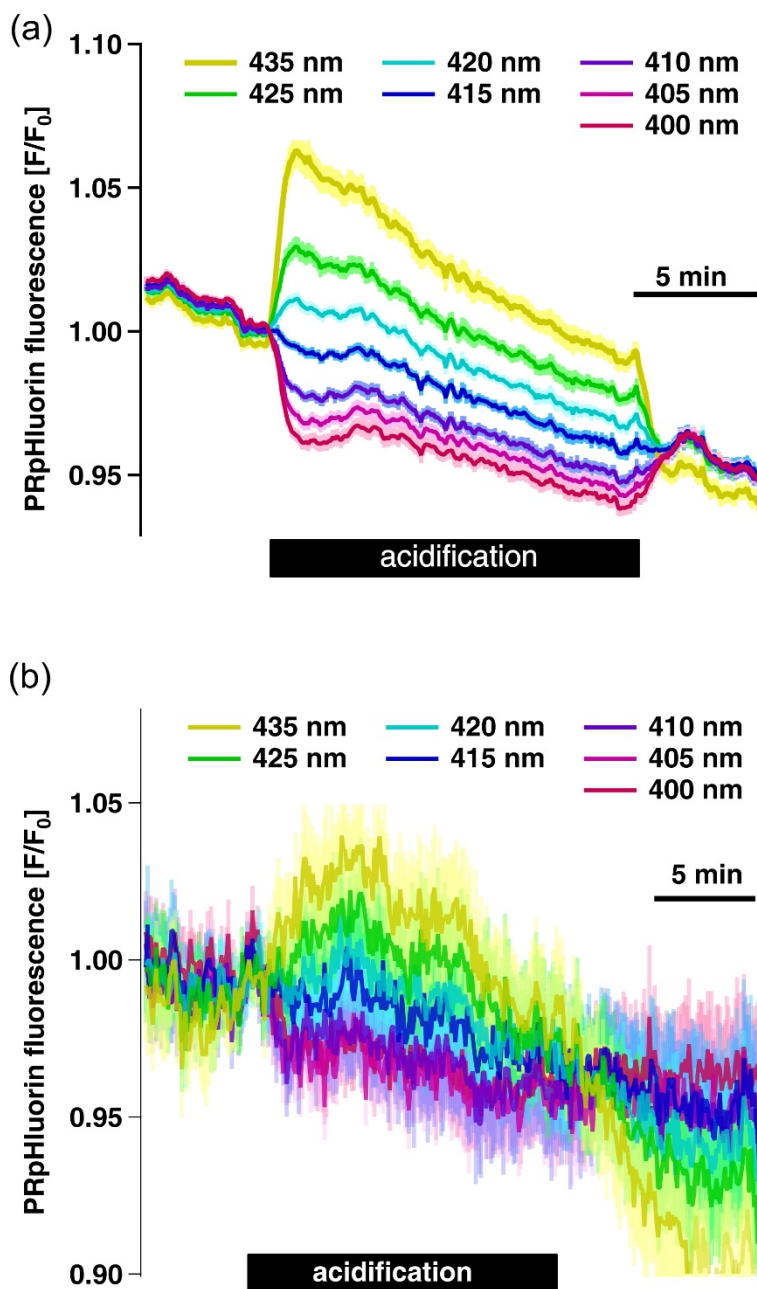

**Figure S1. Isosbestic point of PRpHluorin in pollen tubes and guard cells**

The PRpHluorin fluorescence over time is displayed upon cytosolic acidification in (a) GCs (n=50) and (b) PTs (n=16) when excitation light at each time-point was sequentially switched to wavelength as indicated by the colored traces. For PTs, the fluorescence was quantified from the apex with a modified version of the CHUKNORRIS algorithm. Acidification of the cytosol was achieved by transient application of 2 mM and 5 mM acetate in PTs and GCs, respectively, as indicated by the bar below the fluorescence traces. Error bars = SE.

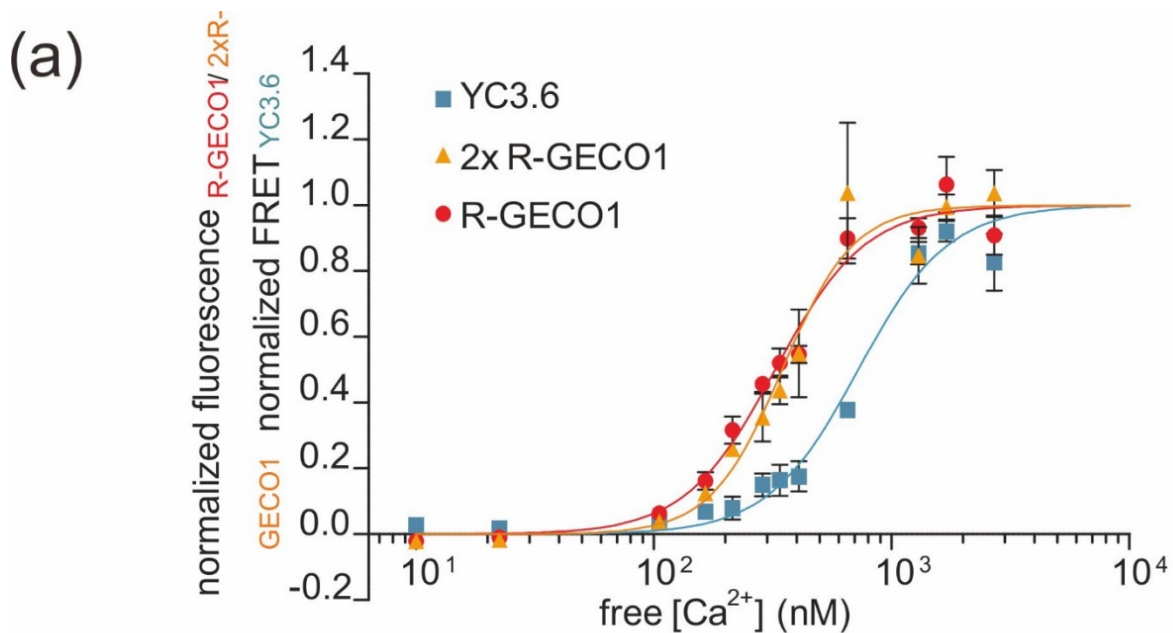

(b)

| GECI variant | $\text{Ca}^{2+}$ affinity $\text{EC}_{50}$ (nM) |            | Hill coefficient |              | $R^2$ |
|--------------|-------------------------------------------------|------------|------------------|--------------|-------|
|              | Best-fit value                                  | 95% CI     | Best-fit value   | 95% CI       |       |
| R-GECO1      | 329                                             | 308 to 352 | 2.36             | 1.94 to 2.78 | 0.91  |
| 2 x R-GECO1  | 352                                             | 313 to 396 | 2.66             | 1.76 to 3.55 | 0.76  |
| YC3.6        | 719                                             | 671 to 770 | 2.12             | 1.89 to 2.35 | 0.92  |

**Figure S2.  $\text{Ca}^{2+}$  binding to YC3.6 and R-GECO1 *in vitro***

(a) *In vitro*  $\text{Ca}^{2+}$  titration curves of R-GECO1, 2 x R-GECO1 and YC3.6. (mean  $\pm$  SEM  $n=4-6$ , 12  $\text{Ca}^{2+}$ -concentrations). One of two independent experiments is shown. For nonlinear regression fits of normalized fluorescence, bottom value was set to zero and top to one.  $\text{EC}_{50}$  values and Hill coefficients are fitted as shared values, among two independent experiments (global fit) with 3-6 technical replicates. Values are summarized in the table below (b). Graph pad prism computed 95 % confidence interval (CI).

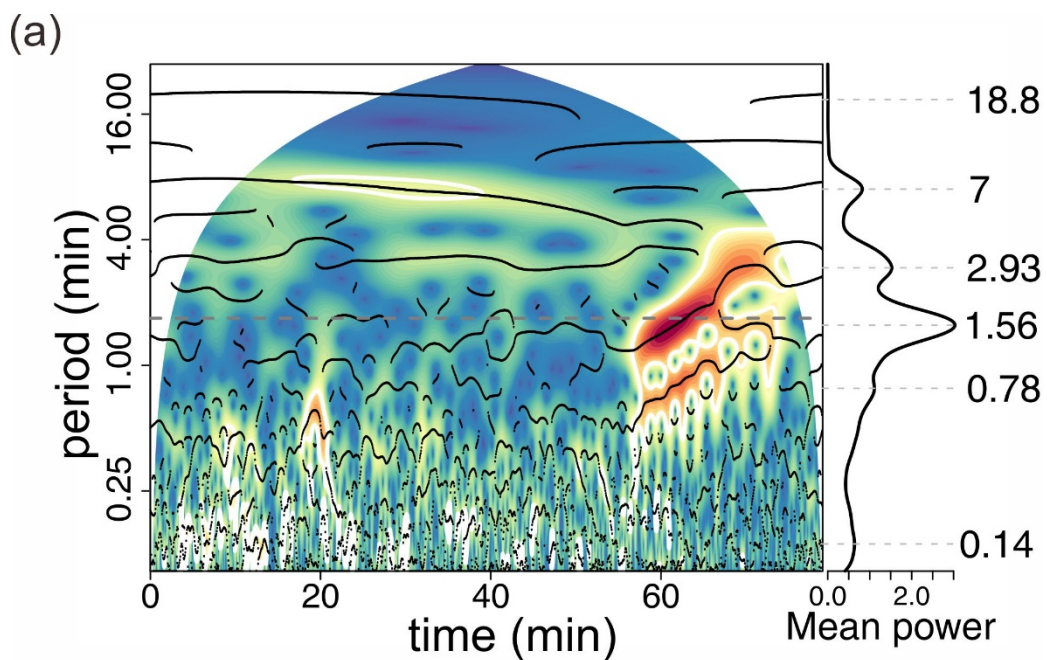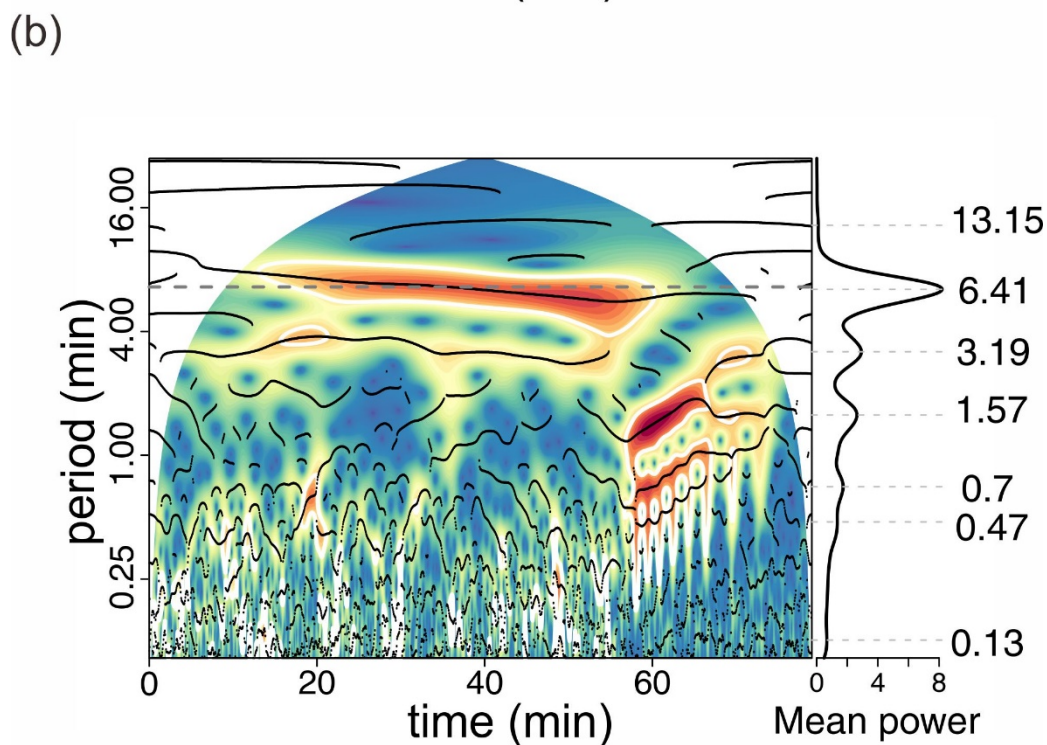

**Figure S3.  $[\text{Ca}^{2+}]_{\text{cyt}}$  and  $[\text{H}^+]_{\text{cyt}}$  oscillations period in pollen tube under high  $\text{Cl}^-$  solution**

(a and b) Continuous wavelet spectrum of the oscillation period dynamics (vertical axis, right side) and mean power of (a) the tip  $[\text{Ca}^{2+}]_{\text{cyt}}$  and (b)  $[\text{H}^+]_{\text{cyt}}$  of the same time-sequence over time received by wavelet transformation analysis of Fig.3a. The phase relationships reported are found on the ridges of the wavelet transformed and within the regions of statistical significance of the transformation as indicated by areas bordered by a white line in the wavelet spectra. Colors (from blue to red) correspond to the power of specific oscillatory components through time (time-frequency space) with significant ( $p < 0.05$ ) areas bordered with a white line.

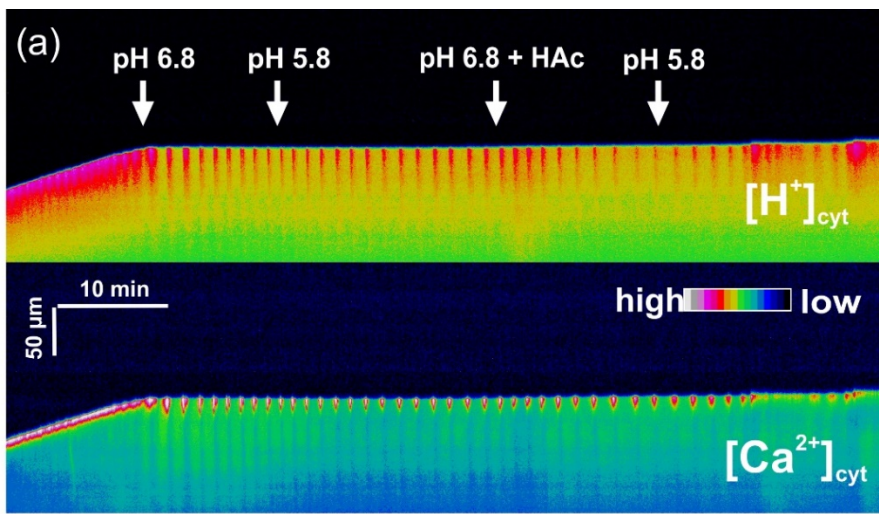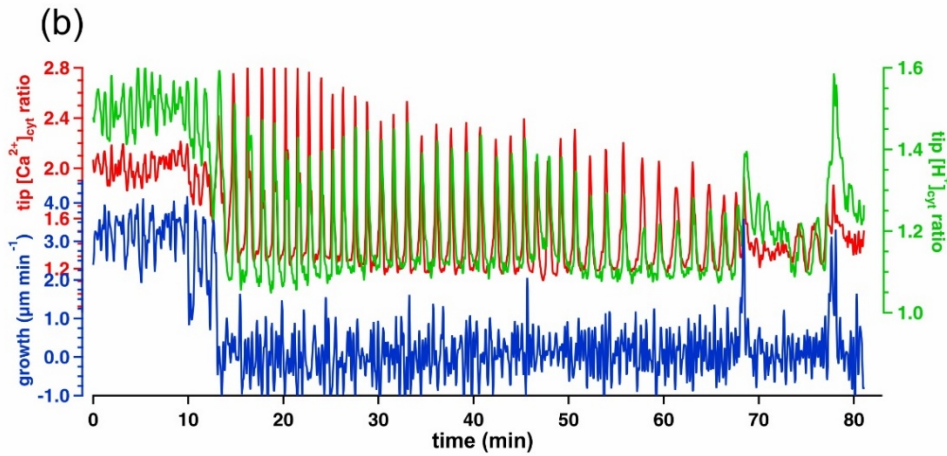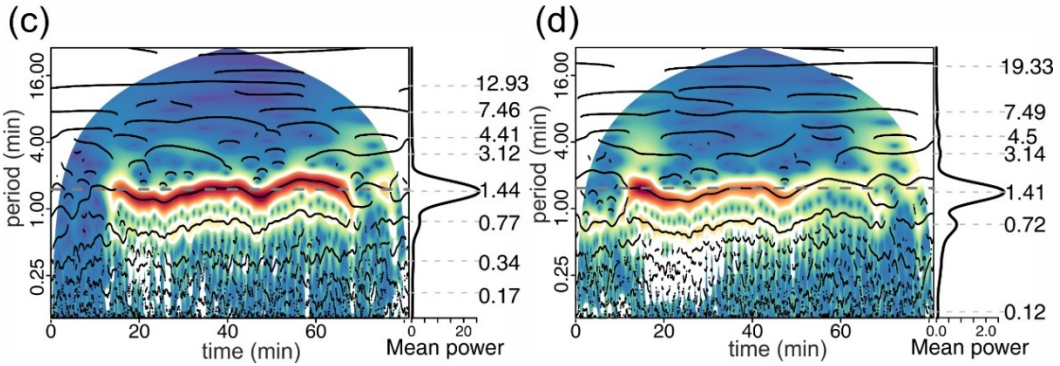

**Figure S4. Pollen tube growth arrest is associated with tip  $[Ca^{2+}]_{\text{cyt}}$  oscillations preceding  $[H^+]_{\text{cyt}}$  oscillations, which is independent on the pH-gradient across the plasma membrane**

CapHensor imaging of an example *N. tabacum* pollen tube challenged with different extracellular solutions to change the pH-gradient across the plasma membrane. (a) False colored kymographs showing the  $[H^+]_{\text{cyt}}$  (top) and  $[Ca^{2+}]_{\text{cyt}}$  (bottom) dynamics when the medium pH was changed as indicated or was supplemented with 2 mM Acetate (HAc) to acidify the cytoplasm. (b) Tip  $[Ca^{2+}]_{\text{cyt}}$ - (red) and  $[H^+]_{\text{cyt}}$  (green) ratio signals and growth velocity (blue) plotted against the time from the cell shown in (a). Please note: during growth arrest, tip  $[Ca^{2+}]_{\text{cyt}}$  oscillations precede tip  $[H^+]_{\text{cyt}}$  oscillations with all media tested. (c and d) Wavelet spectra derived from wavelet transformations of (c) the tip  $[Ca^{2+}]_{\text{cyt}}$ - and (d)  $[H^+]_{\text{cyt}}$  ratio signals from the experiment in (a) show stable  $[Ca^{2+}]_{\text{cyt}}$  and  $[H^+]_{\text{cyt}}$  oscillation periods (vertical axis, right). Colors (blue to red) correspond to the power of specific oscillatory components through time (time-frequency space) with significant ( $p < 0.05$ ) areas bordered with a white line.

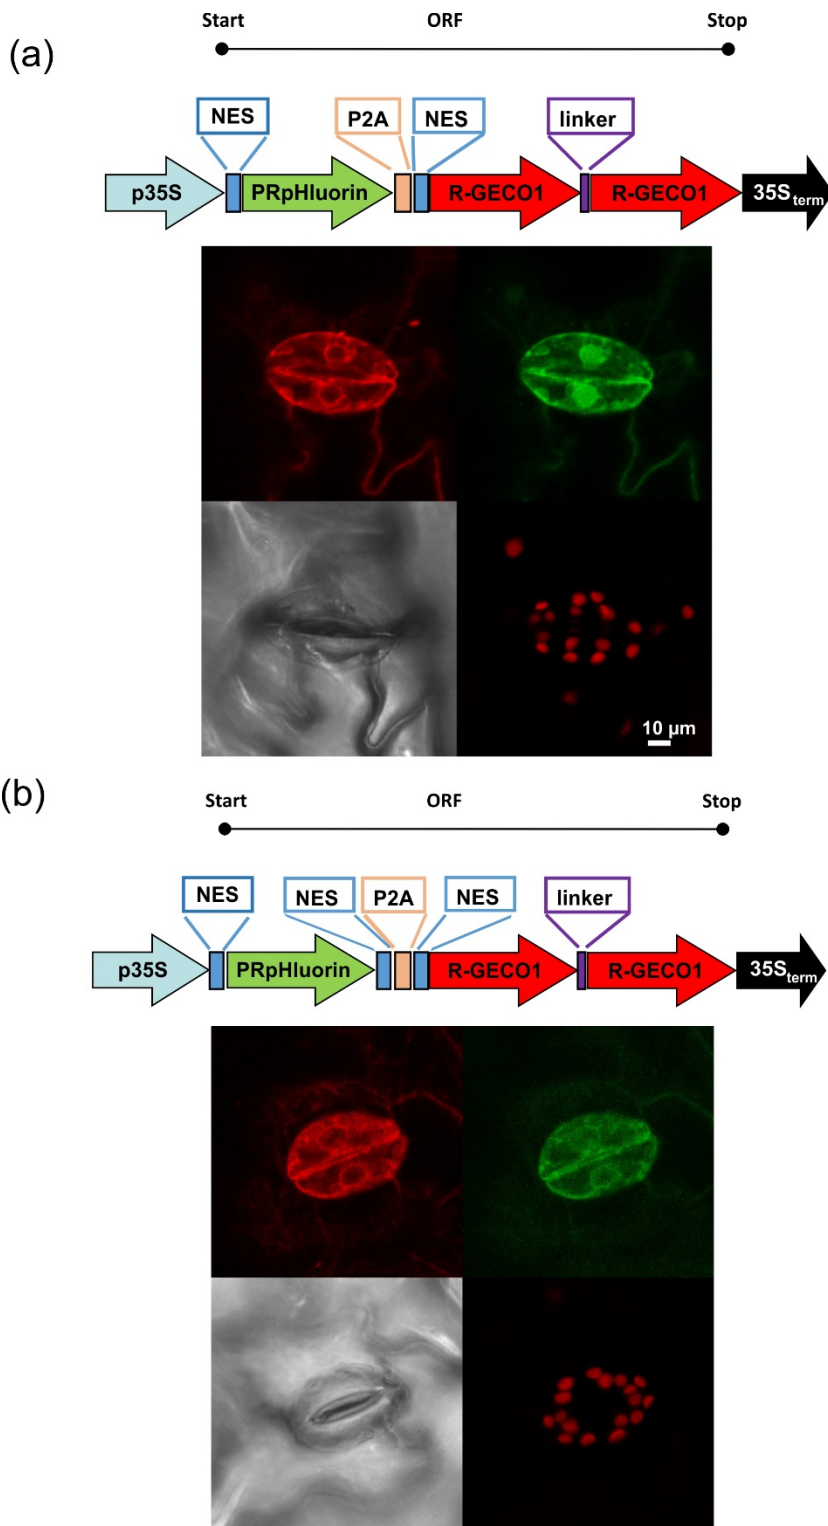

### Figure S5. Subcellular localization of CapHensor versions in guard cells

Confocal images (Z-projections) of representative *Nicotiana tabacum* GCs expressing different multicistronic constructs harboring CapHensor versions. Upper part of figure (a) and (b) shows the vector design. The two vectors are basically the same, in (a) the N-terminus of PRpHluorin is equipped with a nuclear exclusion sequence (NES) while the vector in (b) harbors an additional NES-sequences at the C-terminus of PRpHluorin. Lower part of figure (a) and (b) shows R-GECO1- (red), PRpHluorin- (green), and chlorophyll (red) fluorescence as well as brightfield (gray) image. Note: green fluorescence of PRpHluorin shows cytosolic and nucleus localization in (a) while in (b) it resides in the cytosol only. Subcellular localization of red fluorescence demonstrates R-GECO1 to reside in the cytosol.

SR1 WT

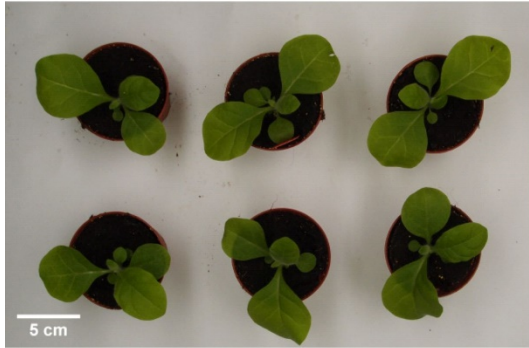

NLS-NLS PRpHluorin  
CapHensor

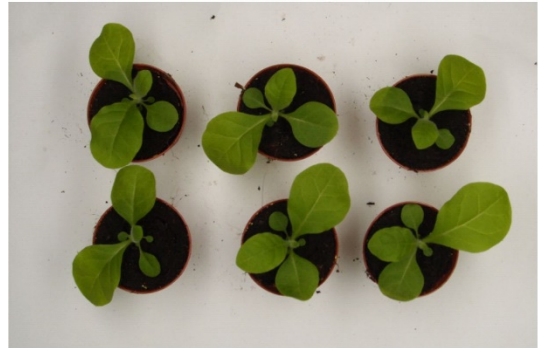

NES PRpHluorin  
CapHensor

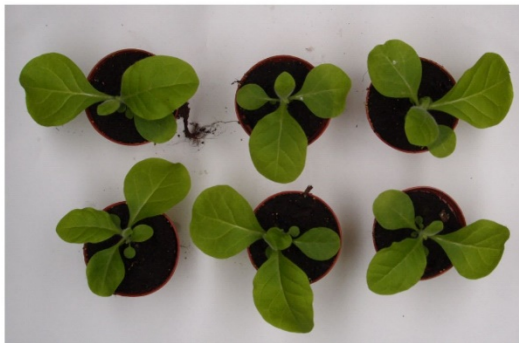

NES PRpHluorin NES  
CapHensor

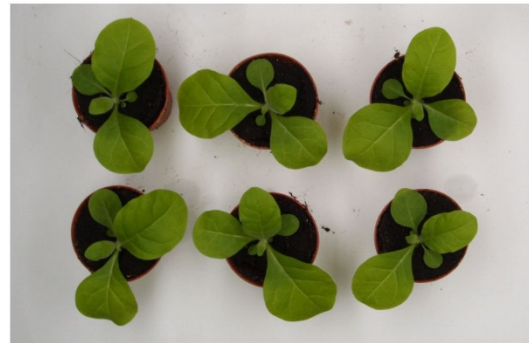

**Figure S6. Transgenic *N. tabacum* CapHensor lines grow normal**

Phenotype of 5-week-old *N. tabacum* plants grown side by side in the green house. WT plants and transgenic CapHensor expressing plants are compared. Six plants each are shown of wild type (SR1, variety Petite Havana) background (upper left), nucleus-targeted CapHensor (upper right, NLS-NLS CapHensor), cytosol-targeted CapHensor with N-terminal NES at the PRpHluorin (lower left) or N- and C-terminal NES at the PRpHluorin (lower right).

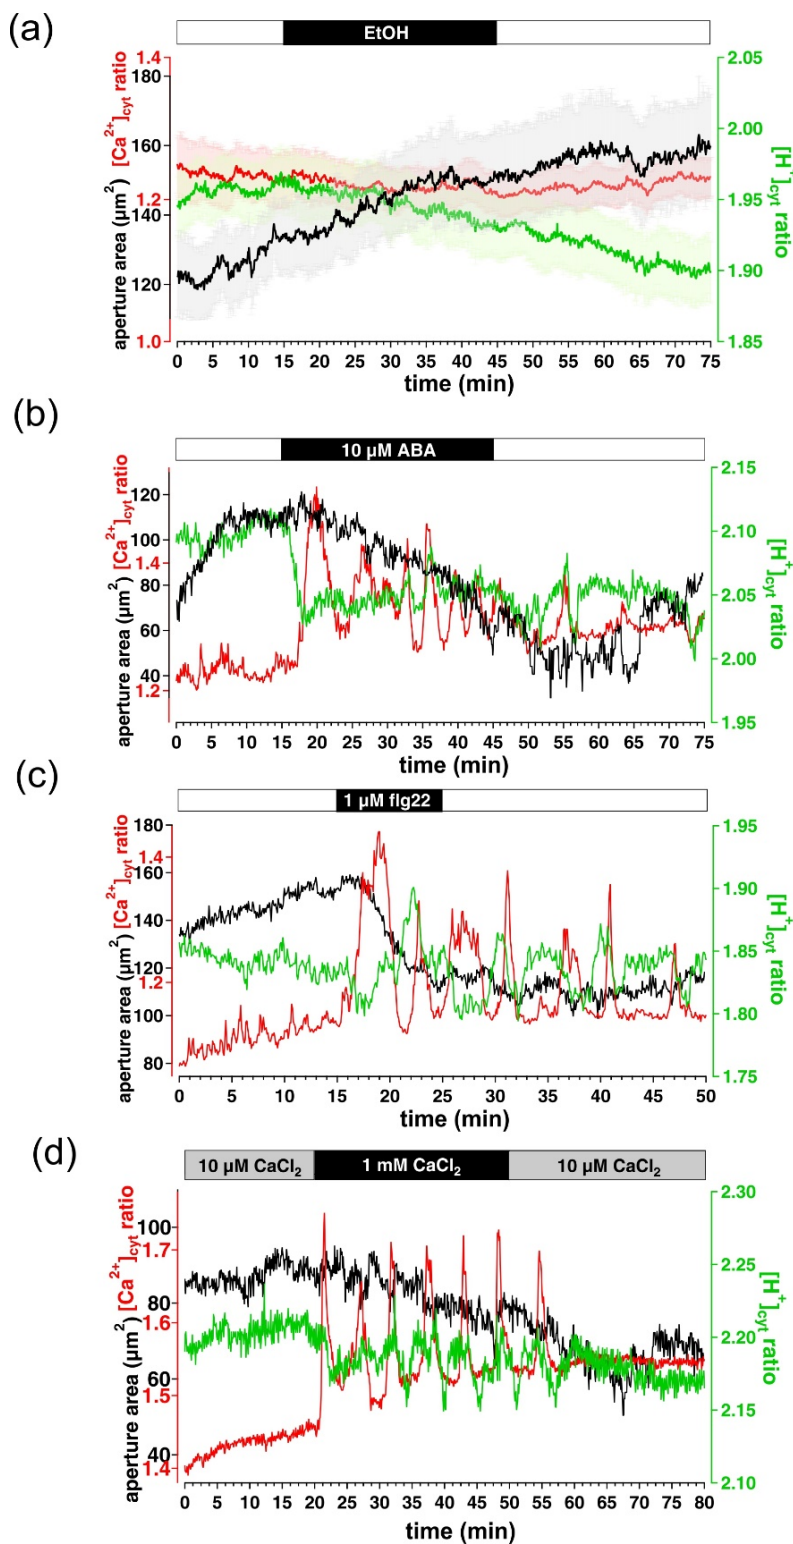

**Figure S7.  $[\text{Ca}^{2+}]_{\text{cyt}}$  and  $[\text{H}^+]_{\text{cyt}}$  oscillations in individual guard cells upon ABA, flg22 and high  $\text{Ca}^{2+}$  treatment**

Time-lapse CapHensor imaging together with stomata aperture monitoring in GCs of *N. tabacum* epidermal strips. (a) Mean  $[\text{Ca}^{2+}]_{\text{cyt}}$  ratio (red),  $[\text{H}^+]_{\text{cyt}}$  ratio (green) and stomatal aperture area (black) over time upon application of 0.005 % EtOH ( $n=16$ ), which corresponds to the amount when treated with 10  $\mu\text{M}$  ABA. (b-d)  $[\text{Ca}^{2+}]_{\text{cyt}}$  ratio (red),  $[\text{H}^+]_{\text{cyt}}$  ratio (green) and stomatal aperture area (black) over time in single representative guard cell upon application of (b) 10  $\mu\text{M}$  ABA, (c) 1  $\mu\text{M}$  flg22 and (d) increasing  $\text{Ca}^{2+}$ -concentration via perfusion from 10  $\mu\text{M}$   $\text{CaCl}_2$  to 1 mM  $\text{CaCl}_2$ .



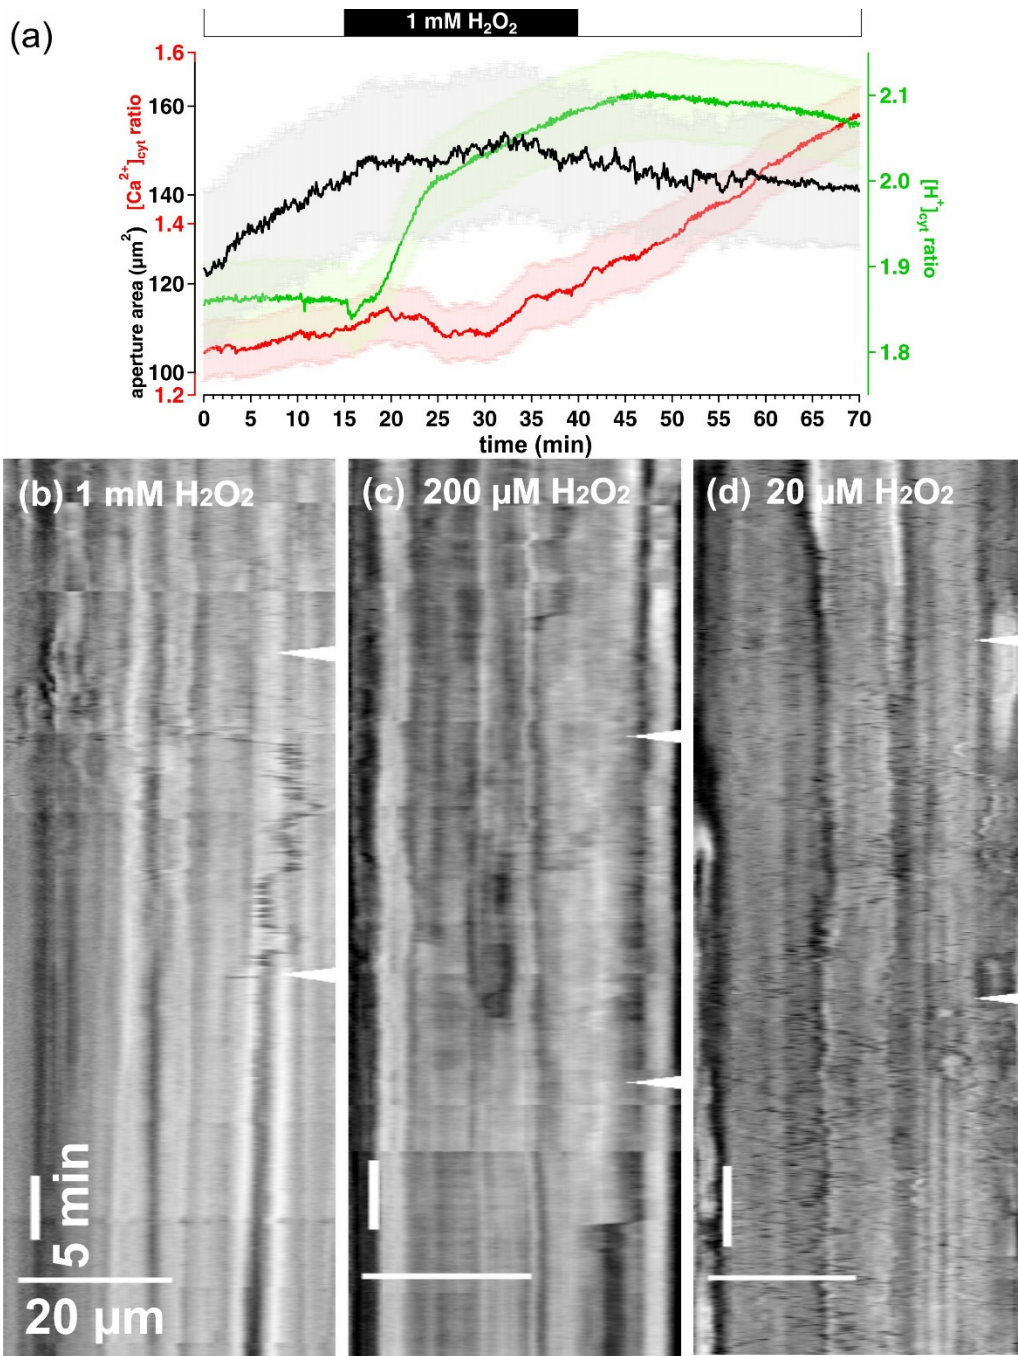

### Figure S8. 1 mM H<sub>2</sub>O<sub>2</sub> results in loss of guard cell integrity

Time-lapse CapHensor imaging together with stomata aperture monitoring in GCs of *N. tabacum* epidermal strips. (a) Mean [Ca<sup>2+</sup>]<sub>cyt</sub> ratio (red), [H<sup>+</sup>]<sub>cyt</sub> ratio (green) and stomatal aperture area (black) over time upon application of 1 mM H<sub>2</sub>O<sub>2</sub> (n=18). Error bars = SE. (b-d) Brightfield kymographs of a representative guard cell treated with (b) 1 mM H<sub>2</sub>O<sub>2</sub>, (c) 200  $\mu\text{M}$  H<sub>2</sub>O<sub>2</sub> and (d) 20  $\mu\text{M}$  H<sub>2</sub>O<sub>2</sub>. White marks on the right side of the kymographs indicate the time of H<sub>2</sub>O<sub>2</sub> treatment and wash out. Note: Cytoplasmic streaming results in a noisy pattern within the kymograph, whereas slow-moving or aggregated cytoplasm after loss of cell vitality results in distinct and constant patterning of the kymograph.

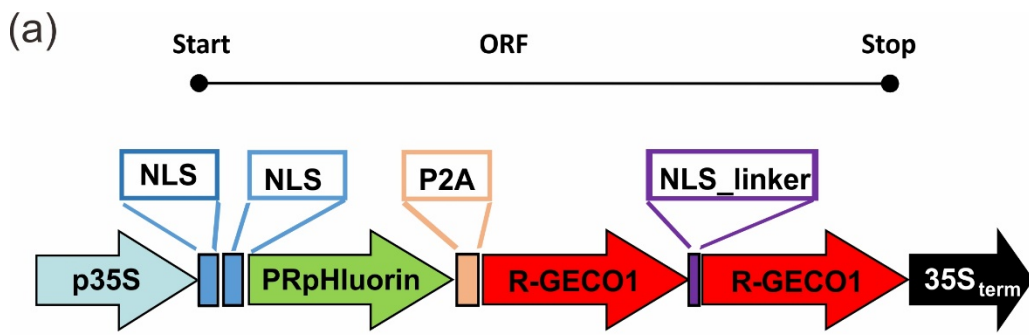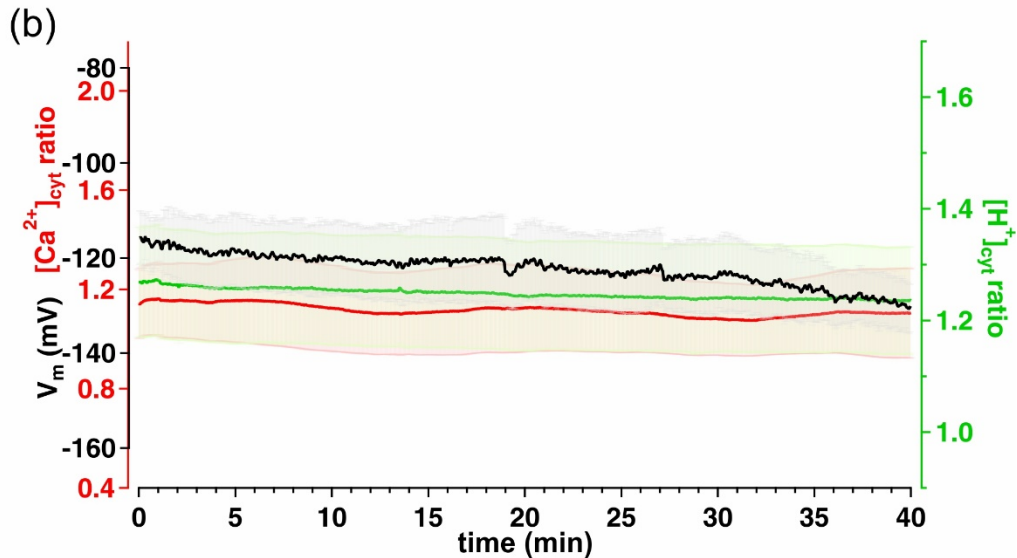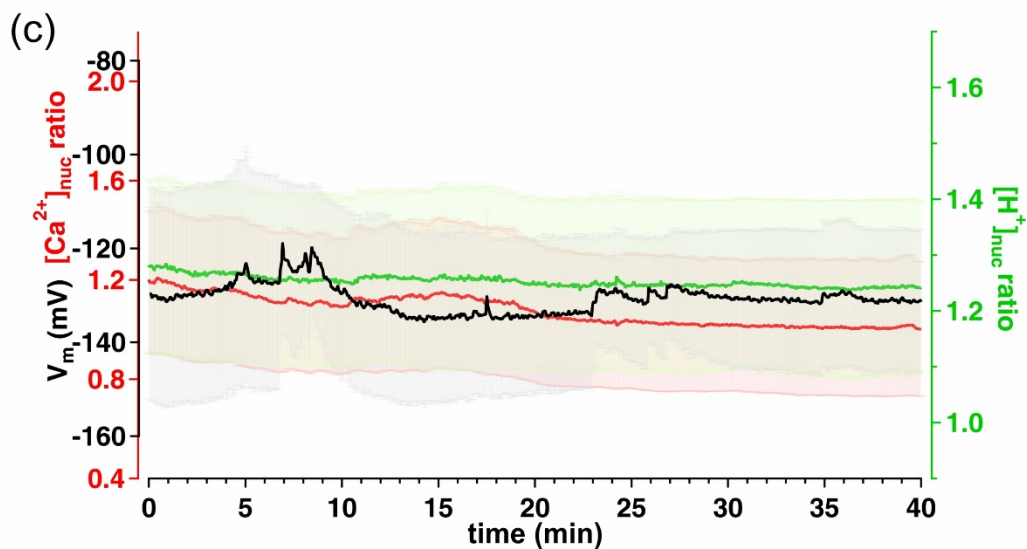

**Figure S9.  $Ca^{2+}$ ,  $H^+$  and  $V_m$  regime in the mesophyll under control conditions**

Simultaneous  $Ca^{2+}$ ,  $H^+$  and membrane voltage ( $V_m$ ) recordings in mesophyll cells of *N. benthamiana* leaves transiently expressing a cytosolic- or nuclear version of the CapHensor. (a) The vector design to localize the CapHensor in nuclei. The N-terminus of PRpHluorin in the CapHensor construct is equipped with two different nuclear localization sequences (NLS). Additionally, a NLS is sandwiched by the two R-GECO1s. (b) Mean  $[Ca^{2+}]_{cyt}$  ratio (red),  $[H^+]_{cyt}$  ratio (green) and  $V_m$  (black) under control conditions (n=4). (c) Mean  $[Ca^{2+}]_{nuc}$  ratio (red),  $[H^+]_{nuc}$  ratio (green) and  $V_m$  (black) under control conditions (n=3). Error bars = SE.

**Table S1. Primers used for cloning CapHensor versions**

| Cloning Primers               | Sequences                                                                           |
|-------------------------------|-------------------------------------------------------------------------------------|
| <b>CapHensor NLS</b>          |                                                                                     |
| NLSNLS PR User pHluorin fwd   | GGCTTAAUATGCCAAAAAGAAGAGAAAGGTAGAAAGACCCCATGCCAAAGAAGAAGCGTAAGGTAAGT                |
| Long NLS PR pHluorin User fwd | GGCTTAAUATGCCAAAAAGAAGAGAAAGGTAGAAAGACCCAGTAAAGGAGAAGAACTTTTCACTGGAG T              |
| P2A pHluorin User rev         | AGCCTGCTUCAGCAGGCTGAAGTTAGTAGCTCCGCTTCCTTTGTATAGTTCATCCATGCCATG                     |
| P2A half R-GECO1 fwd          | AAGCAGGCUGGAGACGTGGAGGAGAACCCTGGACCTATGGTCGACTCTTCACGTCGTAAG                        |
| NLS-linker R-GECO1 rev        | ACCTTCTCUTCTTTTTGGAGGCTTCGCTGTCATCATTTGTACAAACT                                     |
| NLS-linker R-GECO1 fwd        | AGAGAAAGGUAGAAGACCCCGGGGATCCACCGGTCGCCACCGTCGACTCTTCACGTCGTAAGTGG                   |
| RGECO1 User rev               | GGTTAAUUCTACTTCGCTGTCATCATTTGTACAAA                                                 |
| <b>CapHensor NES</b>          |                                                                                     |
| pHluorin half NES User rev    | AGCTTCTTCUGCAAGGCCACCGCTTTGTATAGTTCATCCATGCCATGT                                    |
| NES USER fwd                  | GGCTTAAUATGCTGCAGAACGAGCTTGC                                                        |
| P2A half NES User fwd         | AGAAGAAGCUGGAGGAGCTAGAGCTTGGAAGCGGAGCTACTAACTTCAGC                                  |
| RGECO1 RGECO1 User rev        | ACTGAGGTTUAATCCCTTCGCTGTCATCATTTGTACAAAC                                            |
| RGECO1 RGECO1 User fwd        | AAACCTCAGUGGTGGAATGGTCGACTCTTCACGTCGT                                               |
| RGECO1 User rev               | GGTTAAUUCTACTTCGCTGTCATCATTTGTACAAA                                                 |
| Half NES pHluorin fwd         | ACAAGACUGGAGGAGTCGACTCGAGTGCGGCCGCCACCATGAGTAAAGGAGAAGAAGCTTTTCACTG                 |
| LeLAT half NES rev            | AGTCTTGUTAATATCAAGTCCAGCCAACCTAAGAGCAAGCTCGTTCTGCAGCATTTTTTTTTTTGGTGTGTGTACTTTTTTTT |
| UBQ10 half NES rev            | AGTCTTGUTAATATCAAGTCCAGCCAACCTAAGAGCAAGCTCGTTCTGCAGCATGATCCCGCACTCGAGCTGT           |
| P2A half NES rev              | AGTCTTGUTAATATCAAGTCCAGCCAACCTAAGAGCAAGCTCGTTCTGCAGCATAGGTCCAGGGTTCTCCTCCAC         |
| Half NES R-GECO1 fwd          | ACAAGACUGGAGGAGTCGACTCGAGTGCGGCCGCCACCATGGTCGACTCTTCACGTCGTAA                       |
| <b>Sequencing primers</b>     |                                                                                     |
| UBQ10 seq fwd                 | TGTCGAATAATTACTCTTCG                                                                |
| pHluorin CT seq fwd           | CGAAAGATCCCAACGAAAAG                                                                |
| R-GECO1 NLS-linker seq fwd    | TGACAGCGAAGCCTCCAAAAA                                                               |
| R-GECO1 NLS-linker seq rev    | GAGTCGACGGTGGCGACC                                                                  |
| pHluorin User rev             | GGTTAAUUTTATTTGTATAGTTCATCCATGCCATG                                                 |
| 35S Terminator rev            | GGT TTA AUG TCA CTG GAT TTT GGT TTT AGG AAT TAG                                     |

RGECO1 RGECO1 seq rev  
RGECO1 RGECO1 seq fwd  
LeLAT52 seq fwd  
R-GECO1 mid seq rev  
RBC seq rev

TTCCACCACTGAGGTTTAATCCC  
GGGATTAAACCTCAGTGGTGGAA  
CAAGACACACACAAAGAGAAGGAG  
CCC TCG ATC TCG AAC TCG TG  
GTG CGC AAT GAA ACT GAT GC

### **Video S1.**

Time-lapse CapHensor imaging of a representative *N. tabacum* PT from Fig. 2a, b with false colored  $[H^+]_{\text{cyt-}}$  (top) and  $[Ca^{2+}]_{\text{cyt}}$  (bottom) ratio, and widefield image (bottom) upon sequential extracellular medium perfusions of different pH or low osmolarity (hypo shock).

### **Video S2.**

Time-lapse CapHensor imaging of a representative *N. tabacum* PT from Fig. 2d, e with false colored  $[H^+]_{\text{cyt-}}$  (top) and  $[Ca^{2+}]_{\text{cyt}}$  (bottom) ratio, and widefield image (bottom) upon 3 mM caffeine perfusion.

### **Video S3.**

Time-lapse CapHensor imaging of a representative *N. tabacum* PT from data presented in Fig. 3a, b with false colored  $[H^+]_{\text{cyt-}}$  (top) and  $[Ca^{2+}]_{\text{cyt}}$  (bottom) ratio, and widefield image (bottom). Extracellular medium  $Cl^-$ -increase from 10 mM  $Cl^-$  to 20 mM  $Cl^-$  (t=10 min) and later (t=55 min) alkalization of the medium (pH 6.8) was performed.

### **Video S4.**

Time-lapse CapHensor imaging of a representative *N. tabacum* GC in epidermal strip. Movie corresponds to data presented in Fig. 4a with false colored  $[H^+]_{\text{cyt-}}$  (top) and  $[Ca^{2+}]_{\text{cyt}}$  (middle) ratio, and widefield image (bottom). Extracellular application of 10  $\mu$ M ABA at t=15-45 min was performed. Please note the decrease in  $[H^+]_{\text{cyt-}}$ -ratio, increase in  $[Ca^{2+}]_{\text{cyt}}$ -ratio together with stomatal closure during the presence of 10  $\mu$ M ABA. Upon wash-out of ABA the stoma re-opens.

### **Video S5.**

Time-lapse CapHensor imaging of a representative *N. tabacum* GC in epidermal strip. Movie corresponds to data presented in Fig. 4d with false colored  $[H^+]_{\text{cyt-}}$  (top) and  $[Ca^{2+}]_{\text{cyt}}$  (middle) ratio, and widefield image (bottom). Extracellular application of 1  $\mu$ M flg22 at t=15-25 min was performed. Please note the unaltered  $[H^+]_{\text{cyt-}}$ -ratio, but strong

increase in  $[Ca^{2+}]_{cyt}$ -ratio together with stomatal closure upon 1  $\mu M$  flg22 treatment. Upon wash-out of 1  $\mu M$  flg22 the stoma does not re-open.

### **Video S6.**

Two time-lapse CapHensor imaging series of representative *N. tabacum* GCs in epidermal strips upon 200  $\mu M$  H<sub>2</sub>O<sub>2</sub> (left side) or 1 mM H<sub>2</sub>O<sub>2</sub> (right side) treatment, arranged next to one another. Movies correspond to data presented in Fig. 4g and Fig. S8 and show false colored  $[H^+]_{cyt}$ - (top) and  $[Ca^{2+}]_{cyt}$  (middle) ratio, as well as widefield images (bottom). The time course of H<sub>2</sub>O<sub>2</sub> application (t=15-40 min) is the same for both cells. Please note the strong increase in  $[H^+]_{cyt}$ -ratio but unaltered  $[Ca^{2+}]_{cyt}$ -ratio and stomatal aperture with 200  $\mu M$  H<sub>2</sub>O<sub>2</sub>, but increase in  $[H^+]_{cyt}$ - and  $[Ca^{2+}]_{cyt}$ -ratio together with stomatal closure upon 1 mM H<sub>2</sub>O<sub>2</sub> application. Important to note is that steep  $[H^+]_{cyt}/[Ca^{2+}]_{cyt}$ -ratio increase and stomatal closure is caused by loss of cell integrity upon 1 mM H<sub>2</sub>O<sub>2</sub> application, visible by the lack of cytoplasmic streaming within the brightfield (see also Fig. S8) and ratio images.

### **Video S7.**

Two time-lapse imaging series of representative *N. benthamiana* mesophyll tissue when expressing the cytosolic or nuclear version of the CapHensor are arranged next to one another. The response to 0.1  $\mu M$  flg22 with the same time course is presented and correspond to data presented in Fig. 6 b and f. False colored  $[H^+]_{cyt}$ - (top) and  $[Ca^{2+}]_{cyt}$  (middle) ratio images as well as the brightfield images (bottom) of mesophyll tissue expressing the cytosolic- (left row) or nuclear (right row) CapHensor version. Please note the strong increase in  $[H^+]_{cyt}$ - and  $[Ca^{2+}]_{cyt}$ -ratio in areas of the cytosol or nuclei after flg22-treatment when expressing the cytosolic or nuclear version of the CapHensor, respectively.

**Notes S1.** R-scripts for quantitative analysis of data from pollen tubes, guard cells and mesophyll cells. A zip-file is provided as supporting information, including three folders with R-scripts and example files for analysis as well as a Microsoft Word document with explanations on how to use those R-scripts.
